# Supplementary material
Source: publisher figshare collection journal article supplement (https://springernature.figshare.com/ndownloader/files/15175268)
Supplement: Supplementary file 1 [file 15175268]

Fig S1: TEM micrograph of mesoporous silica nanoparticles.

1. (b)

Fig S2: Chromatogram of cefadroxil, cefprozil and cefadrine on using (a) phosphate buffer: methanol (80:20) as a mobile phase and cephalexin as internal standard and (b) acetate buffer acetonitrile: methanol (78:9:13).

1. (b)

(C )

Fig S3: Percentage of treatment by adsorption vs the sample number for (a) cefadroxil, (b) cefprozil and (c) cefadrine.

1. (b)

(c)

Fig S4: Normal plot of residuals for the factorial design, (a) for cefadroxil, (b) cefprozil and (c) cefradine percentage treatment.

1. (b)

(c)

Fig S5: Plot of residuals vs predicted response for factorial design, (a)percentage of treatment of cefadroxil, (b) cefprozil and (c) cefadrine.
